# Supplementary material
Source: PubMed Central journal article supplement (PMC6911624)
Supplement: NIHMS1058631-supplement-Supplementary_Figure_1.pdf [file NIHMS1058631-supplement-Supplementary_Figure_1.pdf]

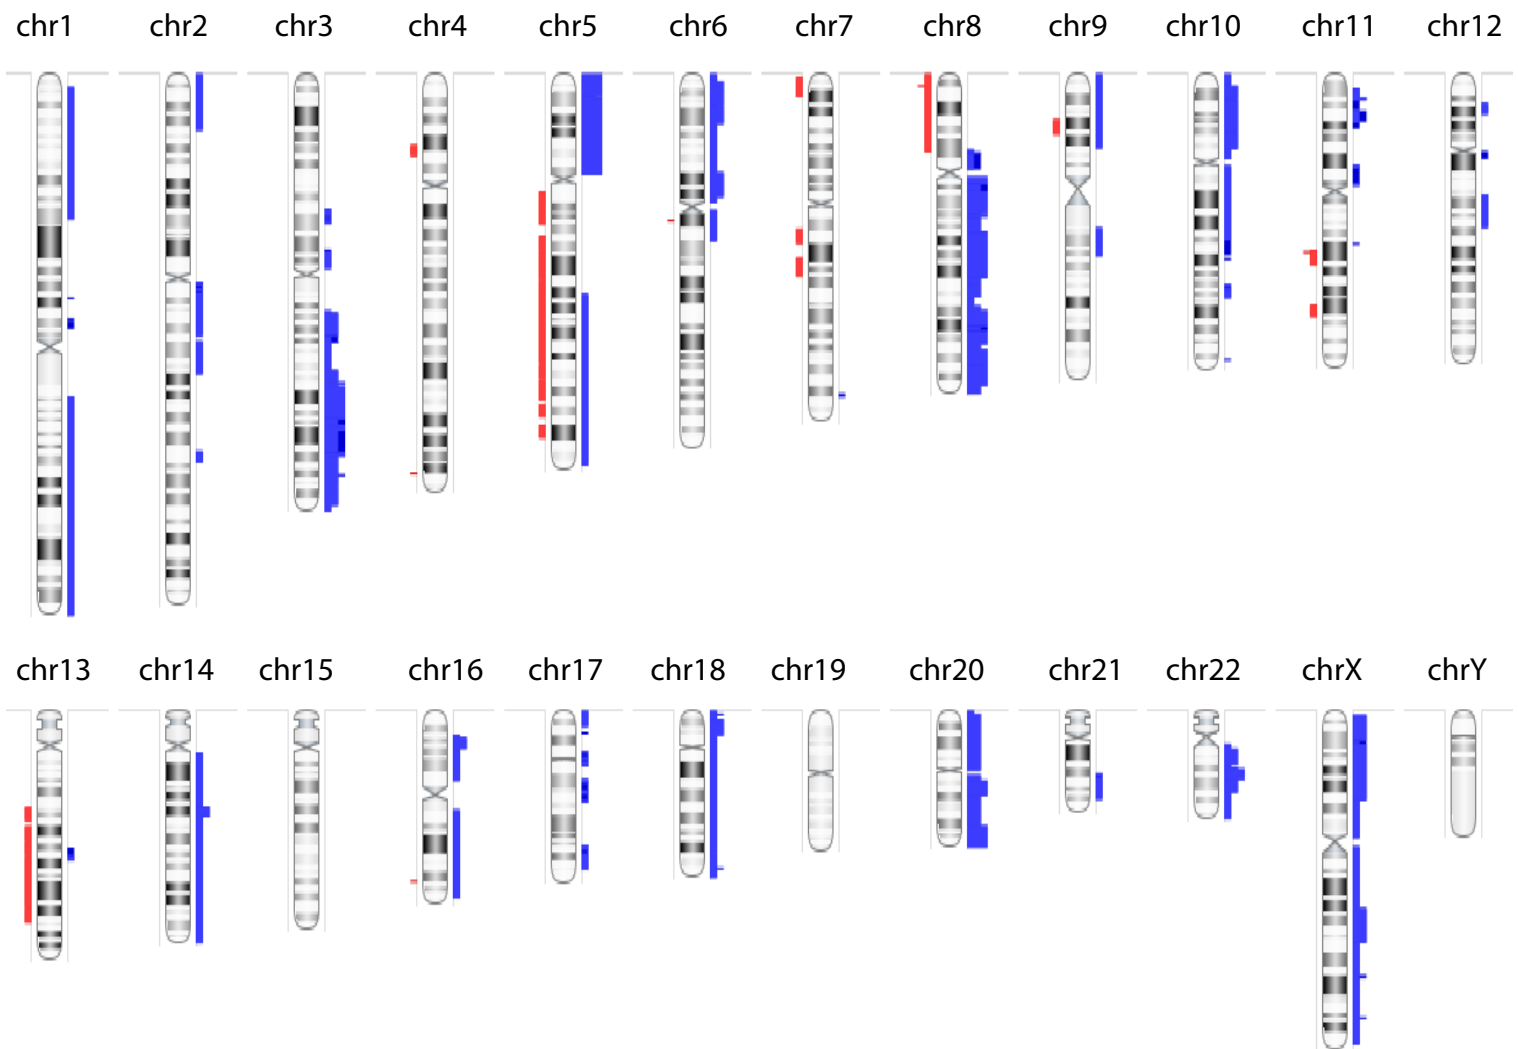

**Supplementary Figure 1.** Somatic copy number alterations among 6 clear cell endometrial carcinomas. Ideogram depicting aggregate somatic gains (blue) and losses (red) among 22 autosomes and X chromosome. Data were displayed using Nexus Copy Number Software v10 (Biodiscovery).
