# Supplementary material
Source: PubMed Central journal article supplement (PMC6911624)
Supplement: NIHMS1058631-supplement-Supplementary_Figure_4.pdf [file NIHMS1058631-supplement-Supplementary_Figure_4.pdf]

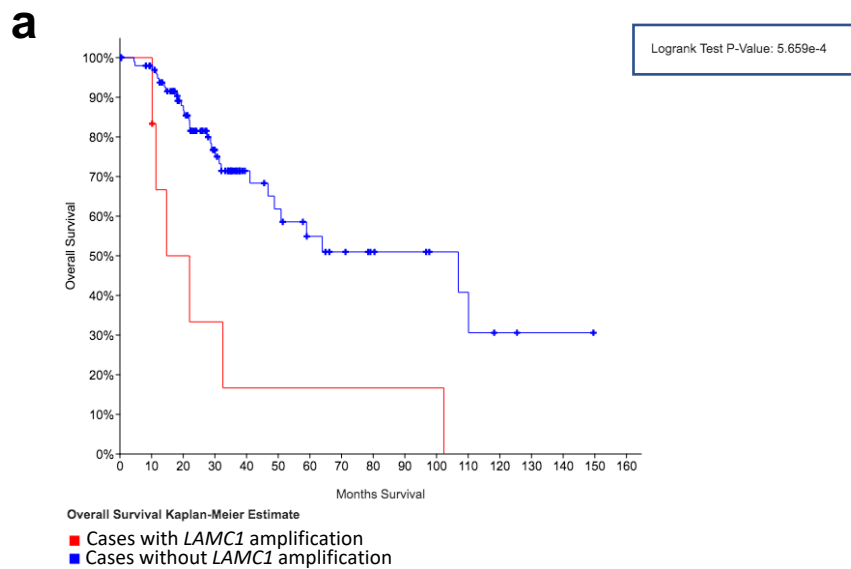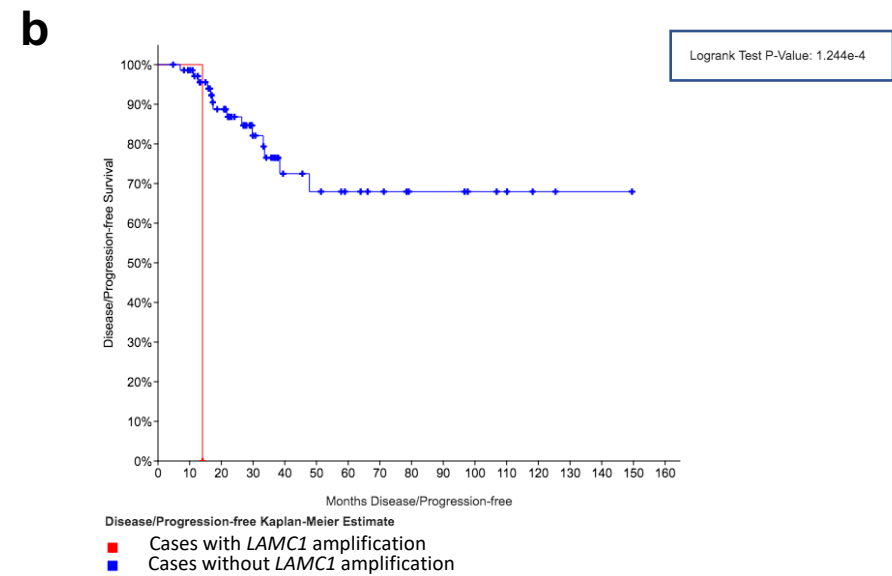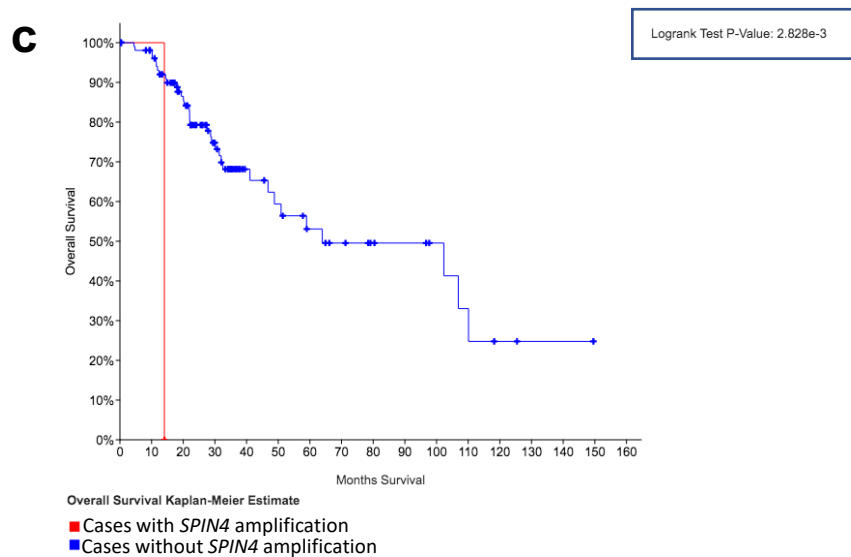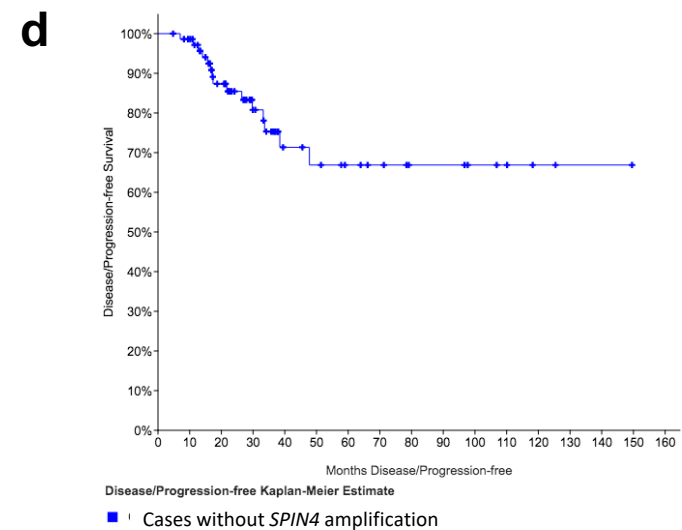

**Supplementary Figure 4.** Kaplan-Meier plots for TCGA serous ECs (n=108) showing overall survival and disease/progression-free survival according to *LAMC1* amplification status (a, b), or *SPIN4* amplification status (c, d). Plots were generated by the cBIOPortal for Cancer Genomics (<https://www.cbioportal.org/>)
